# Supplementary material for: SiNPs improve the waterlogging tolerance of ginger by increasing water absorption in the root system
Source: Royal Society of Chemistry journal article supplement (doi:10.1039/d5en00254k), 2025-01-01
Supplement: d5en00254k1.pdf [file d5en00254k1.pdf]

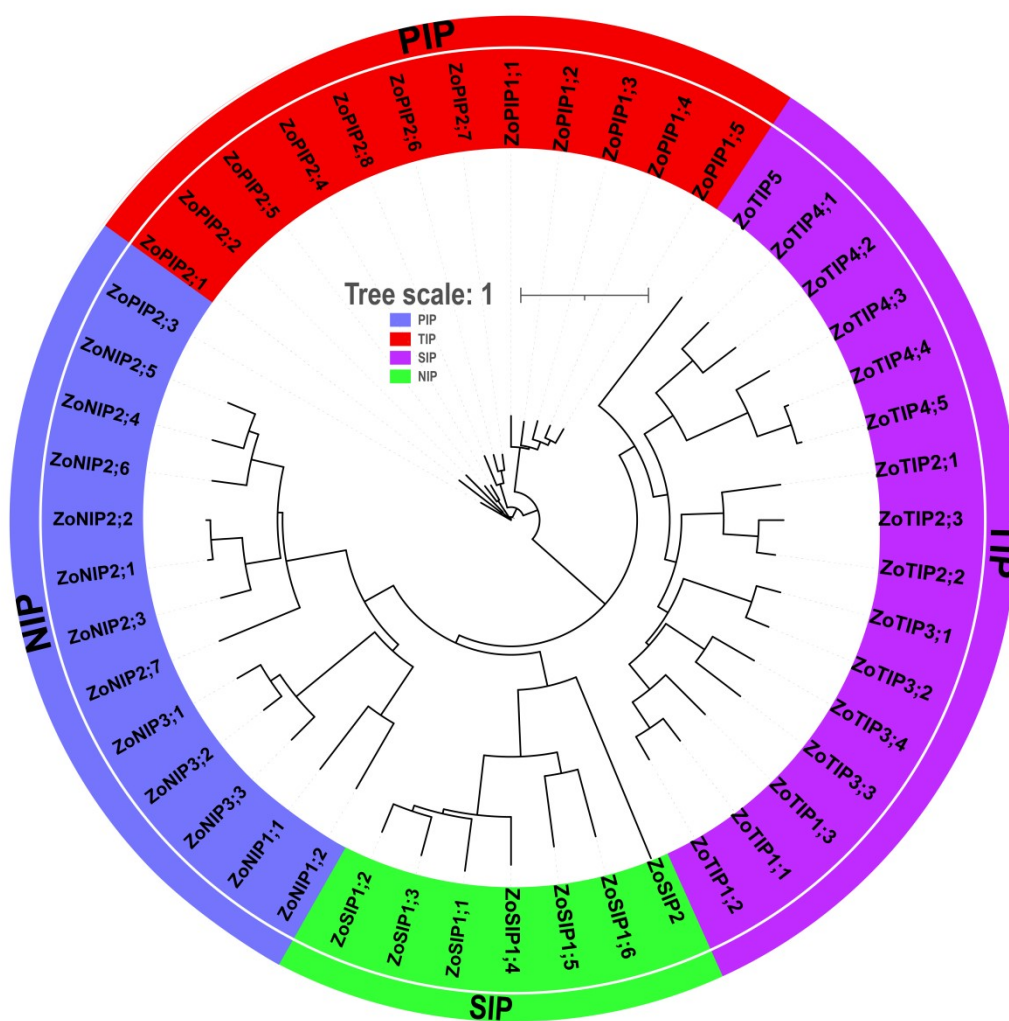

Supplementary Fig 1. Phylogenetic tree of the *ZoAQP* protein. Different colored circles represent different type of *ZoAQP*.

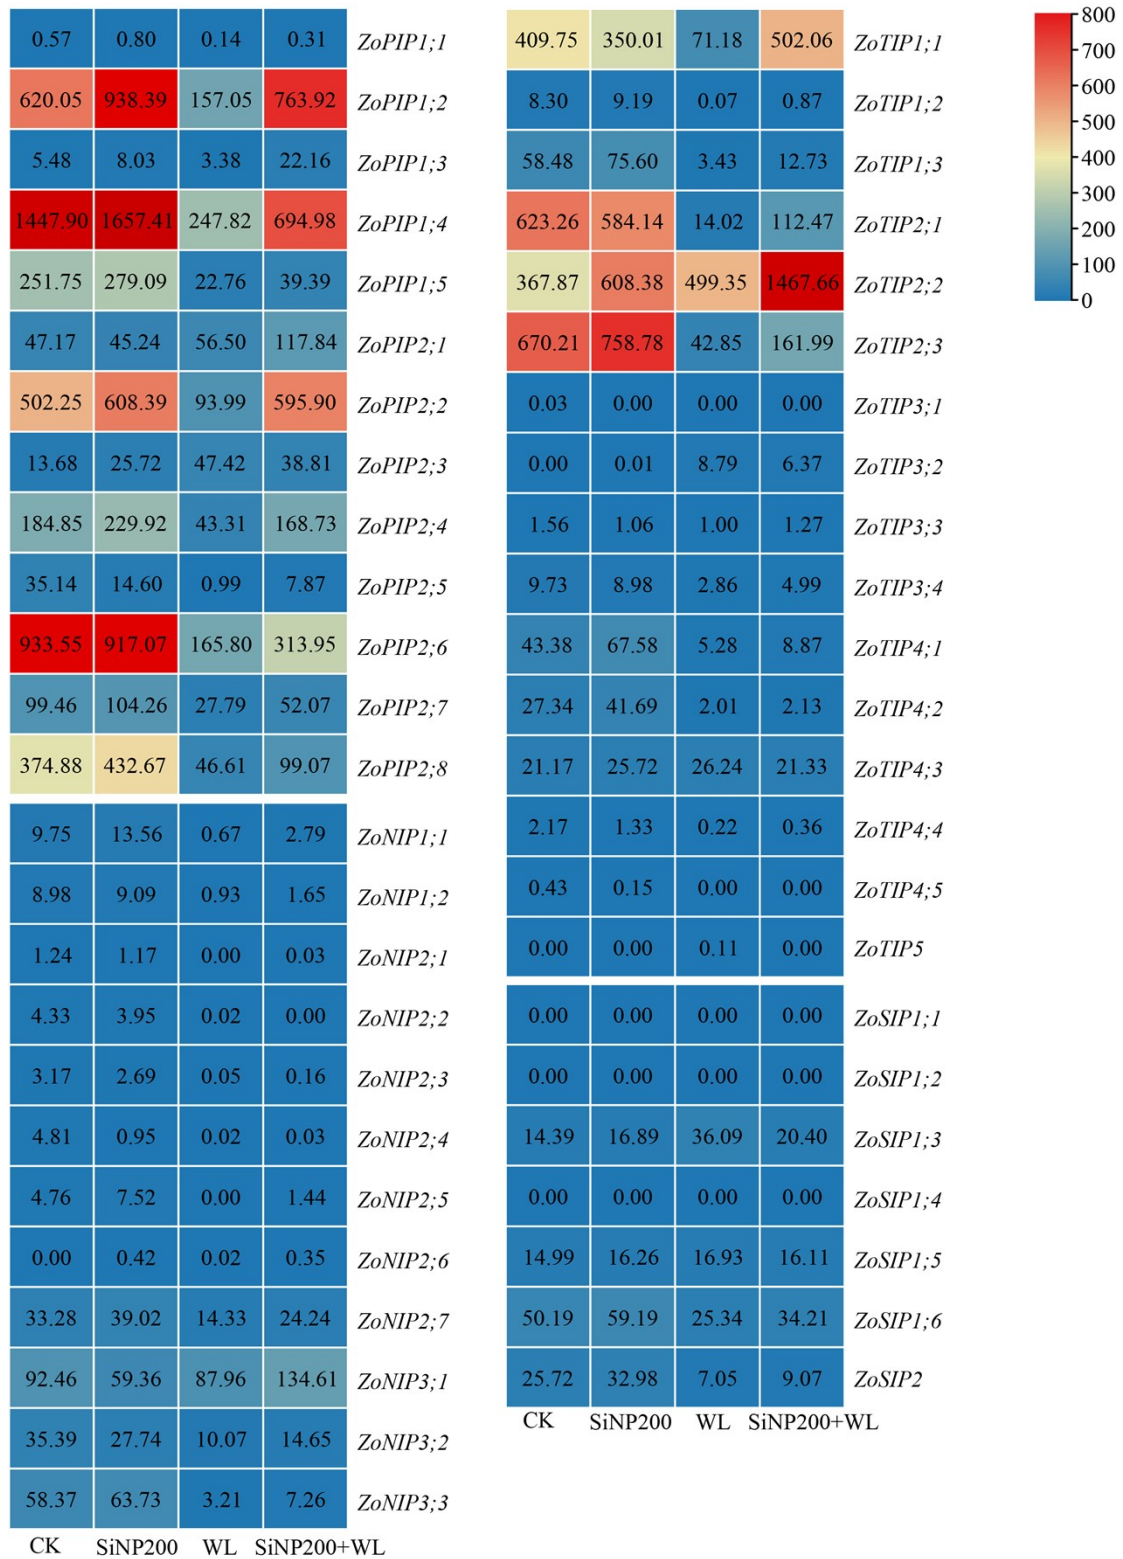

Supplementary Fig 2. Expression patterns of *ZoAQP* abiotic stress treatments. The values of transcripts Per Kilobase of exon model per Million mapped reads were used to draw the heatmap.
